# Supplementary material for: Regio- and stereocontrolled synthesis of novel 3-sulfonamido-2,3,4,5-tetrahydro-1,5-benzothiazepines from 2-(bromomethyl)- or 2-(sulfonyloxymethyl)aziridines
Source: Royal Society of Chemistry journal article supplement (doi:10.1039/b804246m), 2008-01-01
Supplement: b804246m.pdf [file b804246m.pdf]

## Supporting Information

### Regio- and stereocontrolled synthesis of novel 3-sulfonamido-2,3,4,5-tetrahydro-1,5-benzothiazepines from 2-(bromomethyl)- or 2-(sulfonyloxymethyl)aziridines

Michinori Karikomi, Matthias D'hooghe, Guido Verniest and Norbert De Kimpe\*

#### Synthesis of 3-aminobenzothiazepines **6**, **7** and **8**

As a representative example, the synthesis of 3-benzenesulfonamido-2,3,4,5-tetrahydro-1,5-benzothiazepine **6a** is described here. To an ice-cooled, stirred solution of 1-toluenesulfonyl-2-(bromomethyl)aziridine **2a** (2.76 g, 10 mmol) in dry THF (20 mL) was added 2-aminothiophenol (1.50 g, 12 mmol) and potassium carbonate (1.66 g, 12 mmol). The mixture was stirred for 1 hour at 0 °C and 2 hours at room temperature, and then refluxed for 5 hours. The reaction mixture was poured into water (40 mL) and extracted with dichloromethane (3 × 40 mL). Drying (MgSO<sub>4</sub>), filtration of the drying agent, removal of the solvent in vacuo and recrystallization from toluene afforded 3-benzenesulfonamido-2,3,4,5-tetrahydro-1,5-benzothiazepine **6a** as 2:1 mixed crystals with toluene.

**3-Benzenesulfonamido-2,3,4,5-tetrahydro-1,5-benzothiazepine 6a.** <sup>1</sup>H NMR (270 MHz, CDCl<sub>3</sub>): δ 2.60 (1H, d×d×d, J = 14.5, 4.9, 1.3 Hz); 2.75 (1H, d×d, J = 14.5, 2.6 Hz); 2.93 (1H, d×d, J = 13.9, 1.6 Hz); 3.31 (1H, m); 3.64 (1H, m); 3.91 (1H, m); 6.00 (1H, d, J = 10.2 Hz); 6.77 (1H, d×d, J = 7.9, 1.0 Hz); 6.85 (1H, t×d, J = 7.9, 1.0 Hz); 7.10 (1H, t×d, J = 7.9, 1.0 Hz); 7.36 (1H, d×d, J = 7.6, 1.3 Hz); 7.56 (3H, m); 7.96 (2H, m). <sup>13</sup>C NMR (68 MHz, CDCl<sub>3</sub>): δ 37.0, 51.4, 52.0, 120.6, 122.1, 125.1, 126.9, 128.5, 129.3, 132.8, 132.9, 141.6, 151.3. IR (neat, cm<sup>-1</sup>): ν = 3320, 1588, 1475, 1323. MS (70 eV): m/z (%): 310 (M<sup>+</sup>, 5); 243 (39); 203 (100). Anal. Calcd for C<sub>15</sub>H<sub>16</sub>N<sub>2</sub>O<sub>2</sub>S<sub>2</sub>·0.4C<sub>7</sub>H<sub>8</sub>: C 59.84, H 5.42, N 7.84. Found: C 58.86, H 5.65, N 7.76.

**3-(*N*-toluenesulfonamido)-2,3,4,5-tetrahydro-1,5-benzothiazepine 6b.**  $^1\text{H}$  NMR (270 MHz,  $\text{CDCl}_3$ ):  $\delta$  2.44 (3H, s); 2.59 (1H, dxd,  $J = 13.5, 4.9$  Hz); 2.74 (1H, dxd,  $J = 14.5, 2.7$  Hz); 2.95 (1H, dxd,  $J = 13.5, 2.0$  Hz); 3.30 (1H, m); 3.70 (1H, d,  $J = 4.6$  Hz); 3.85 (1H, m); 6.00 (1H, d,  $J = 9.9$  Hz); 6.76 (1H, dxd,  $J = 7.6, 1.3$  Hz); 7.08 (1H, txd,  $J = 7.6, 1.6$  Hz); 7.33 (3H, m); 7.81 (2H, d,  $J = 8.2$  Hz).  $^{13}\text{C}$  NMR (68 MHz,  $\text{CDCl}_3$ ):  $\delta$  21.6, 51.5, 51.8, 120.5, 121.9, 124.9, 127.0, 128.4, 129.8, 132.8, 138.6, 143.5, 151.3. IR (neat,  $\text{cm}^{-1}$ ):  $\nu = 3354, 3284, 1476, 1320$ . MS (70 eV):  $m/z$  (%): 334 ( $\text{M}^+$ , 0.7); 278 (30); 84 (100).

**3-(*N*-methanesulfonamido)-2,3,4,5-tetrahydro-1,5-benzothiazepine 6c.**  $^1\text{H}$  NMR (270 MHz,  $\text{CDCl}_3$ ):  $\delta$  2.90 – 3.20 (6H, m); 2.52 (1H, m); 3.80 (1H, br s); 4.02 (1H, m); 5.75 (1H, d,  $J = 9.6$  Hz); 6.81 (1H, dxd,  $J = 7.9, 1.0$  Hz); 6.87 (1H, m); 7.13 (1H, txd,  $J = 7.3, 1.3$  Hz); 7.42 (1H, dxd,  $J = 7.6, 1.3$  Hz).  $^{13}\text{C}$  NMR (68 MHz,  $\text{CDCl}_3$ ):  $\delta$  37.7, 42.7, 51.6, 52.4, 120.6, 122.1, 124.9, 128.5, 133.0, 151.3. IR (neat,  $\text{cm}^{-1}$ ):  $\nu = 3360, 3330, 1478, 1320$ . MS (70 eV):  $m/z$  (%): 217 (4); 138 (12); 84 (100).

***trans*-4-Phenyl-3-*p*-toluenesulfonamido-2,3,4,5-tetrahydro-1,5-benzothiazepine 7a.**  $^1\text{H}$  NMR (270 MHz,  $\text{CDCl}_3$ ):  $\delta$  2.38 (3H, s); 3.02 (1H, dxd,  $J = 14.8, 2.6$  Hz); 3.37 (1H, s(br)); 3.90 (1H, m); 4.11 (1H, dxd,  $J = 14.8, 3.3$  Hz); 4.75 (1H, d,  $J = 9.6$  Hz); 4.85 (1H, d,  $J = 8.6$  Hz); 6.40 (1H, dxd,  $J = 7.9, 1.3$  Hz); 6.74 (1H, txd,  $J = 7.9, 1.3$  Hz); 6.92 (1H, txd,  $J = 7.2, 1.6$  Hz); 7.00-7.40 (10H, m).  $^{13}\text{C}$  NMR (68 MHz,  $\text{CDCl}_3$ ):  $\delta$  21.5, 36.8, 57.9, 64.1, 119.0, 120.7, 126.8, 127.4, 128.3, 129.1, 129.5, 131.0, 138.2, 139.5, 142.6, 146.6. IR (neat,  $\text{cm}^{-1}$ ):  $\nu = 3364, 3279, 3025, 1588, 1471$ . MS (70 eV):  $m/z$  (%): 410 ( $\text{M}^+$ , 0.4); 85 (100).

***trans*-4-Propyl-3-(*N*-toluenesulfonamido)-2,3,4,5-tetrahydro-1,5-benzothiazepine 7b.**  $^1\text{H}$  NMR (270 MHz,  $\text{CDCl}_3$ ):  $\delta$  0.78 (3H, t,  $J = 6.9$  Hz); 1.2 – 1.5 (4H, m); 2.27 (1H, dxd,  $J = 14.8, 3.6$  Hz); 2.44 (3H, s); 3.24 (1H, dxd,  $J = 14.8, 2.0$  Hz); 3.32 (1H, br s); 3.55 (1H, br s); 3.64 (1H, dxdxdxd,  $J = 9.9, 5.9, 3.3, 2.7$  Hz); 5.81 (1H, d,  $J = 9.9$  Hz); 6.66 (1H, txd,  $J = 7.6, 1.3$  Hz); 6.80 (1H, txd,  $J = 7.6, 1.3$  Hz), 7.04 (1H, dxd,  $J = 7.6, 1.7$  Hz), 7.24 (1H, dxd,  $J = 7.6, 1.7$  Hz); 7.32 (2H, d,  $J = 8.2$  Hz); 7.80 (2H, d,  $J = 8.2$  Hz).  $^{13}\text{C}$  NMR (68 MHz,  $\text{CDCl}_3$ ):  $\delta$  14.7, 20.5, 22.6, 34.1, 34.5, 56.0, 60.0, 122.0, 122.6, 124.7, 127.8, 128.8, 130.8, 132.7, 139.6, 144.4, 148.6. IR (neat,  $\text{cm}^{-1}$ ):  $\nu = 3363, 3279, 1588, 1471$ . MS (70 eV):  $m/z$  (%): 377 ( $\text{M}^+ + 1$ , 0.64); 362 (100); 84 (87).

***trans*-3-Methanesulfonamido-2-phenyl-2,3,4,5-tetrahydro-1,5-benzothiazepine 8.** <sup>1</sup>H NMR (270 MHz, CDCl<sub>3</sub>): δ 2.39 (3H, s); 3.35 (1H, d×d, J = 14.2, 2.6 Hz); 3.84 (2H, m); 4.30 (1H, d, J = 9.2 Hz); 4.39 (1H, d×d, J = 14.2, 2.0 Hz); 5.03 (1H, d, J = 8.2 Hz); 6.64 (1H, d×d, J = 7.2, 1.0 Hz); 6.90-7.30 (5H, m); 7.39 (2H, d, J = 8.2 Hz). <sup>13</sup>C NMR (68 MHz, CDCl<sub>3</sub>): δ 21.5, 49.2, 52.5, 59.3, 118.6, 120.4, 121.1, 127.0, 127.58, 127.64, 128.9, 129.5, 132.0, 136.7, 138.0, 143.2, 148.6. IR (neat, cm<sup>-1</sup>): ν = 3386, 3298, 1600, 1498. MS (70 eV): m/z (%): 410 (M<sup>+</sup>, 0.5); 125 (100).
